# Supplementary material for: Activation of liver X receptor delayed the retinal degeneration of rd1 mice through modulation of the immunological function of glia
Source: PubMed Central journal article supplement (PMC5458269; doi:10.18632/oncotarget.16643), 2017-03-29
Supplement: oncotarget-08-32068-s001.pdf [file oncotarget-08-32068-s001.pdf]

## Activation of liver X receptor delayed the retinal degeneration of rd1 mice through modulation of the immunological function of glia

### SUPPLEMENTARY FIGURE AND TABLE

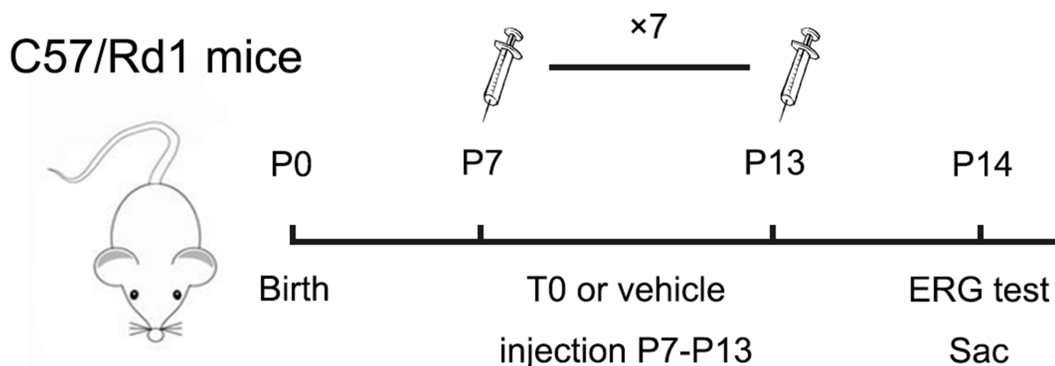

**Supplementary Figure 1: Schematic diagram of the experimental procedures.** Mice were injected with T0901317 or vehicle for 7 successive days (P7-P13). Animals were sacrificed after the ERG test at P14, and the retinas were removed for immunofluorescence, western blot or RT-qPCR.

Supplementary Table 1: Designing QT-PCR primers

| Genes (mouse) | Forward primer         | Reverse primer          |
|---------------|------------------------|-------------------------|
| Cyclophilin-A | CGAGCTCTGAGCACTGGAGA   | TGGCGTGTAAGTCACCACC     |
| LXR $\alpha$  | TCCATCAACCACCCCCACGAC  | CAGCCAGAAAACACCCAACCT   |
| LXR $\beta$   | TCGCCATCAACATCTTCTCAG  | GTGTGGTAGGCTGAGGTGTAA   |
| ABCA1         | GGGTGAACGAGTTTCGGTATG  | CTGAAGATGCTTGGCTTTGCT   |
| ABCG1         | AGAAAGGATGAAGGCAGACGG  | TGCTGGGTTGTGGTAGGTAGGG  |
| Rev-erb       | GTCCTCGTCTGTTCCATCTTC  | AATCTGTGCGGTCACTCTTC    |
| ENG           | CACAGTGCTACCATCCCTTAC  | GGTCATCCAGTGCTGCTATC    |
| iNOS          | CCTCCACCCTACCAAGTAGTAT | GCAAAGGAGGAGAAGGAGAAG   |
| Cox-2         | GGCCATGGAGTGGACTTAAA   | GATACACCTCTCCACCAATGAC  |
| IL-6          | CTTCCATCCAGTTGCCTTCT   | CTCCGACTTGTGAAGTGGTATAG |
| JAK3          | CACAGTGCATGGCCTATGAT   | AGGTGTGGGGTCTGAGAGG     |
| STAT3         | CAAAACCCTCAAGAAGCCAAGG | TCACTCACAATGCTTCTCCGC   |
| SOCS1         | TCGACTGCCTTTTCGAGCTG   | GGAAGGGGAAGGAACTCAGC    |
| SOCS3         | ACATCTATTCTGGGGGCGAG   | AACTCCCGAATGGGTCCAGG    |
| TGF- $\beta$  | CTGTCCAAACTAAGGCTCGC   | GTTGTTGCGGTCCACCATTAG   |
| IL4RA         | GAAGTGGGCAGGCTTCTGTAT  | TAGGCAGGATTGTCTGCAAGG   |
| IL6RA         | CACTGAAGCCGACCTTCCTT   | TGTGTGCTGATCTCGTGGTG    |
